# Supplementary material
Source: Royal Society of Chemistry journal article supplement (https://www.rsc.org/suppdata/fd/1999/267/moviev2.doc)
Supplement: Supplementary file 1 [file moviev2.doc]

STM movie showing the palladium nanoparticle enhanced re-oxidation of a non-stoichiometric single crystal TiO2(110) support. The images initially show Pd particles on the cross-linked (12) surface. Upon exposure to oxygen the TiO2 re-oxidises by the reaction of Ti interstitials, which diffuse from the bulk, with the ambient oxygen at the surface to form new layers of TiO2 on top of the original surface. In the regions far from the particles this reaction occurs in the same way as that of the clean surface as described in the paper. Close to the particles, however, there is a much enhanced growth rate with (11) terminated terraces extending ~100Å from each particle. This occurs due to spillover of oxygen atoms from the Pd nanoparticles onto the TiO2 which results in an enhanced supply of oxygen atoms for the creation of new TiO2 growth. Importantly the growth at the particles always shows the (11) termination in contrast to the clean surface which shows alternating terminations at this temperature, see [[1]](#endnote-2) for equivalent movies of the clean surface. The images are 500Å square and were taken approximately 3 minutes apart at 673K in 210-7 mbar O2.

1. P. Stone, R.A. Bennett and M. Bowker, New Journal of Physics vol. 1, no. 8 (1999) (www.njp.org) [↑](#endnote-ref-2)
